# Supplementary material for: Agricultural Extension Messages Using Video on Portable Devices Increased Knowledge about Seed Selection, Storage and Handling among Smallholder Potato Farmers in Southwestern Uganda
Source: PLoS One. 2017 Jan 25;12(1):e0169557. doi: 10.1371/journal.pone.0169557 (PMC5266271; doi:10.1371/journal.pone.0169557)
Supplement: S1 Data — The first column provides the treatment that the farmer received (Sel+Store, Store, Sel or Ctrl). The next six columns show if the participants to the study answered correct (TRUE) or not (FALSE) on the respective multiple choice question. The next column indicated the block number. The final two questions indicate if subjects had previous knowledge related to seed selection, and storage and handling. The data can be found on https://www.dropbox.com/s/2dtuz8e9fl2m4ba/data_PlosOne_VanCampenhout2016.csv?dl=0. (CSV) [file pone.0169557.s001.csv]

video_shown	sel1	gen1	sel2	store1	store2	gen2	bloc	knowledgePSS	knowledgePSSH
Sel+Store	TRUE	TRUE	TRUE	TRUE	TRUE	TRUE	61	1	1
Store	TRUE	TRUE	TRUE	TRUE	TRUE	FALSE	61	1	1
Ctrl	TRUE	FALSE	TRUE	FALSE	TRUE	TRUE	12	0	1
Sel+Store	TRUE	TRUE	TRUE	TRUE	TRUE	TRUE	27	0	0
Sel	TRUE	TRUE	TRUE	TRUE	TRUE	TRUE	29	0	1
Sel+Store	TRUE	FALSE	TRUE	TRUE	TRUE	TRUE	28	0	1
Sel	TRUE	TRUE	TRUE	TRUE	TRUE	TRUE	60	NA	1
Sel+Store	TRUE	TRUE	TRUE	TRUE	TRUE	TRUE	60	0	1
Ctrl	TRUE	FALSE	TRUE	TRUE	TRUE	TRUE	60	0	1
Ctrl	FALSE	TRUE	TRUE	FALSE	TRUE	FALSE	31	0	1
Ctrl	TRUE	TRUE	FALSE	FALSE	TRUE	FALSE	62	1	1
Store	TRUE	TRUE	TRUE	TRUE	TRUE	TRUE	60	0	1
Sel+Store	TRUE	TRUE	TRUE	TRUE	TRUE	TRUE	43	1	1
Ctrl	FALSE	TRUE	TRUE	FALSE	FALSE	FALSE	30	0	0
Ctrl	TRUE	FALSE	TRUE	FALSE	TRUE	TRUE	11	1	1
Sel	TRUE	TRUE	TRUE	TRUE	TRUE	TRUE	59	0	1
Ctrl	TRUE	FALSE	TRUE	TRUE	TRUE	TRUE	39	0	1
Sel+Store	TRUE	TRUE	TRUE	TRUE	TRUE	TRUE	2	1	1
Sel	FALSE	TRUE	TRUE	TRUE	TRUE	FALSE	9	1	1
Store	TRUE	TRUE	TRUE	TRUE	TRUE	TRUE	14	1	0
Sel+Store	TRUE	TRUE	TRUE	TRUE	TRUE	FALSE	48	0	1
Sel	TRUE	TRUE	TRUE	TRUE	TRUE	TRUE	8	1	1
Store	FALSE	TRUE	TRUE	TRUE	TRUE	TRUE	62	0	1
Sel+Store	TRUE	TRUE	TRUE	TRUE	TRUE	TRUE	33	0	1
Sel	TRUE	TRUE	TRUE	FALSE	TRUE	TRUE	19	1	1
Ctrl	TRUE	TRUE	TRUE	FALSE	TRUE	FALSE	38	1	0
Sel+Store	TRUE	TRUE	TRUE	FALSE	TRUE	FALSE	32	1	1
Sel	TRUE	TRUE	TRUE	FALSE	TRUE	TRUE	53	0	1
Sel	TRUE	TRUE	TRUE	TRUE	TRUE	TRUE	24	1	1
Sel	TRUE	TRUE	TRUE	TRUE	TRUE	FALSE	25	1	1
Store	TRUE	TRUE	TRUE	TRUE	TRUE	TRUE	59	1	1
Store	TRUE	TRUE	TRUE	TRUE	TRUE	TRUE	1	1	1
Store	FALSE	TRUE	TRUE	TRUE	TRUE	TRUE	56	1	1
Sel+Store	TRUE	TRUE	TRUE	TRUE	TRUE	TRUE	47	1	1
Sel	TRUE	TRUE	TRUE	TRUE	TRUE	FALSE	54	1	1
Sel+Store	TRUE	TRUE	TRUE	TRUE	TRUE	FALSE	41	1	1
Sel+Store	TRUE	TRUE	TRUE	FALSE	TRUE	TRUE	15	0	0
Sel	TRUE	TRUE	TRUE	TRUE	TRUE	TRUE	31	0	1
Ctrl	TRUE	TRUE	TRUE	FALSE	TRUE	FALSE	53	1	1
Ctrl	TRUE	FALSE	TRUE	TRUE	TRUE	TRUE	22	0	0
Sel	TRUE	TRUE	TRUE	TRUE	TRUE	TRUE	52	1	1
Sel+Store	FALSE	TRUE	TRUE	TRUE	TRUE	TRUE	53	1	0
Store	TRUE	TRUE	TRUE	TRUE	TRUE	FALSE	49	1	1
Ctrl	TRUE	FALSE	TRUE	TRUE	TRUE	TRUE	26	0	1
Sel+Store	FALSE	TRUE	TRUE	FALSE	FALSE	FALSE	42	1	1
Store	TRUE	TRUE	TRUE	FALSE	TRUE	TRUE	10	0	1
Ctrl	TRUE	FALSE	TRUE	TRUE	TRUE	FALSE	45	1	1
Sel+Store	TRUE	TRUE	TRUE	TRUE	TRUE	TRUE	62	0	0
Sel	TRUE	TRUE	TRUE	TRUE	TRUE	TRUE	61	1	1
Ctrl	TRUE	TRUE	TRUE	FALSE	TRUE	FALSE	2	1	1
Sel	FALSE	TRUE	TRUE	TRUE	TRUE	FALSE	5	1	1
Sel+Store	TRUE	TRUE	TRUE	TRUE	TRUE	TRUE	17	1	0
Sel+Store	FALSE	TRUE	TRUE	TRUE	FALSE	FALSE	52	1	0
Ctrl	TRUE	TRUE	TRUE	FALSE	TRUE	FALSE	59	0	1
Store	TRUE	TRUE	TRUE	TRUE	TRUE	TRUE	28	1	1
Store	TRUE	TRUE	TRUE	TRUE	TRUE	TRUE	24	1	1
Ctrl	TRUE	TRUE	TRUE	TRUE	TRUE	FALSE	1	0	1
Store	TRUE	TRUE	TRUE	FALSE	TRUE	FALSE	4	1	1
Sel	TRUE	TRUE	TRUE	TRUE	TRUE	TRUE	39	1	1
Ctrl	FALSE	TRUE	TRUE	FALSE	TRUE	FALSE	25	0	1
Ctrl	TRUE	FALSE	TRUE	TRUE	TRUE	TRUE	7	1	1
Sel+Store	TRUE	TRUE	TRUE	FALSE	TRUE	FALSE	46	0	1
Ctrl	FALSE	TRUE	FALSE	TRUE	TRUE	FALSE	32	0	1
Sel	TRUE	TRUE	TRUE	TRUE	TRUE	TRUE	55	0	1
Sel	TRUE	TRUE	TRUE	FALSE	TRUE	FALSE	10	0	0
Sel+Store	TRUE	FALSE	TRUE	TRUE	TRUE	TRUE	58	0	0
Ctrl	TRUE	FALSE	TRUE	TRUE	FALSE	TRUE	61	1	0
Sel	TRUE	TRUE	TRUE	TRUE	TRUE	FALSE	34	1	1
Store	TRUE	FALSE	TRUE	FALSE	TRUE	TRUE	47	1	1
Sel	TRUE	TRUE	TRUE	TRUE	TRUE	TRUE	15	0	1
Sel+Store	TRUE	TRUE	TRUE	TRUE	TRUE	TRUE	18	1	1
Sel	TRUE	TRUE	TRUE	TRUE	TRUE	FALSE	26	0	0
Sel+Store	TRUE	TRUE	TRUE	TRUE	TRUE	TRUE	38	0	1
Sel+Store	TRUE	TRUE	FALSE	TRUE	TRUE	TRUE	7	1	1
Ctrl	TRUE	TRUE	TRUE	TRUE	TRUE	TRUE	13	1	1
Sel	FALSE	TRUE	TRUE	TRUE	TRUE	TRUE	41	1	1
Store	TRUE	FALSE	TRUE	TRUE	TRUE	FALSE	13	1	1
Sel	TRUE	TRUE	TRUE	TRUE	TRUE	FALSE	38	0	1
Store	TRUE	TRUE	TRUE	TRUE	TRUE	TRUE	35	1	1
Ctrl	FALSE	TRUE	FALSE	FALSE	TRUE	FALSE	4	1	1
Ctrl	FALSE	TRUE	FALSE	FALSE	TRUE	FALSE	3	0	0
Sel+Store	TRUE	TRUE	TRUE	TRUE	TRUE	FALSE	19	1	1
Sel+Store	FALSE	TRUE	TRUE	TRUE	TRUE	TRUE	13	1	1
Ctrl	TRUE	TRUE	TRUE	TRUE	TRUE	FALSE	34	1	1
Sel+Store	TRUE	TRUE	TRUE	TRUE	TRUE	FALSE	6	1	1
Ctrl	FALSE	TRUE	TRUE	FALSE	TRUE	FALSE	10	1	1
Store	TRUE	TRUE	TRUE	TRUE	TRUE	TRUE	36	1	1
Store	TRUE	TRUE	TRUE	TRUE	TRUE	TRUE	39	1	1
Store	TRUE	TRUE	TRUE	TRUE	TRUE	TRUE	52	1	0
Ctrl	TRUE	TRUE	FALSE	FALSE	TRUE	FALSE	48	1	1
Store	TRUE	TRUE	TRUE	TRUE	TRUE	TRUE	34	1	1
Ctrl	TRUE	TRUE	TRUE	FALSE	TRUE	FALSE	17	1	1
Ctrl	TRUE	FALSE	TRUE	FALSE	FALSE	FALSE	23	1	1
Store	TRUE	TRUE	TRUE	TRUE	TRUE	TRUE	9	1	1
Sel	TRUE	TRUE	TRUE	FALSE	TRUE	FALSE	40	0	1
Sel	TRUE	TRUE	TRUE	TRUE	TRUE	TRUE	23	0	0
Ctrl	FALSE	TRUE	FALSE	TRUE	TRUE	TRUE	16	1	1
Store	TRUE	TRUE	TRUE	FALSE	TRUE	TRUE	46	1	1
Store	TRUE	TRUE	TRUE	TRUE	TRUE	TRUE	3	1	1
Sel+Store	TRUE	TRUE	TRUE	TRUE	TRUE	TRUE	56	1	1
Sel+Store	TRUE	TRUE	TRUE	FALSE	TRUE	TRUE	59	1	1
Sel	TRUE	TRUE	TRUE	TRUE	TRUE	FALSE	16	1	1
Ctrl	TRUE	TRUE	TRUE	TRUE	TRUE	TRUE	35	0	1
Store	FALSE	TRUE	TRUE	TRUE	TRUE	TRUE	21	1	1
Ctrl	TRUE	FALSE	TRUE	TRUE	TRUE	FALSE	28	1	1
Sel	TRUE	TRUE	TRUE	TRUE	TRUE	TRUE	17	1	1
Ctrl	TRUE	FALSE	TRUE	FALSE	TRUE	FALSE	21	1	1
Store	TRUE	TRUE	TRUE	TRUE	TRUE	FALSE	26	0	1
Store	TRUE	TRUE	TRUE	TRUE	TRUE	TRUE	19	1	1
Ctrl	TRUE	TRUE	FALSE	TRUE	TRUE	FALSE	58	1	1
Sel+Store	TRUE	TRUE	TRUE	TRUE	TRUE	TRUE	26	0	1
Store	TRUE	TRUE	TRUE	TRUE	TRUE	TRUE	16	1	1
Sel	TRUE	TRUE	TRUE	TRUE	TRUE	TRUE	14	1	1
Store	TRUE	TRUE	TRUE	TRUE	TRUE	TRUE	53	1	1
Sel	TRUE	TRUE	FALSE	TRUE	TRUE	TRUE	27	0	0
Sel	TRUE	TRUE	TRUE	TRUE	TRUE	TRUE	4	0	1
Sel+Store	TRUE	TRUE	TRUE	FALSE	TRUE	TRUE	44	1	1
Ctrl	TRUE	FALSE	TRUE	FALSE	TRUE	FALSE	9	0	1
Store	TRUE	TRUE	TRUE	TRUE	TRUE	TRUE	8	0	1
Ctrl	FALSE	TRUE	FALSE	FALSE	TRUE	FALSE	54	0	1
Store	TRUE	TRUE	TRUE	TRUE	TRUE	TRUE	40	1	1
Sel	TRUE	TRUE	TRUE	TRUE	TRUE	TRUE	30	1	1
Sel	TRUE	TRUE	TRUE	TRUE	TRUE	FALSE	2	1	1
Sel+Store	TRUE	TRUE	TRUE	TRUE	TRUE	TRUE	11	0	1
Ctrl	TRUE	TRUE	TRUE	FALSE	TRUE	FALSE	43	1	1
Sel	TRUE	TRUE	TRUE	TRUE	TRUE	TRUE	46	0	1
Store	TRUE	TRUE	TRUE	TRUE	TRUE	TRUE	7	0	1
Sel	TRUE	TRUE	TRUE	TRUE	TRUE	TRUE	50	1	0
Store	TRUE	TRUE	TRUE	TRUE	TRUE	TRUE	48	1	1
Ctrl	TRUE	TRUE	TRUE	FALSE	TRUE	TRUE	49	0	1
Store	TRUE	TRUE	TRUE	TRUE	TRUE	TRUE	5	0	0
Sel	TRUE	TRUE	TRUE	TRUE	TRUE	TRUE	56	1	1
Sel+Store	FALSE	TRUE	TRUE	TRUE	TRUE	FALSE	21	1	1
Ctrl	TRUE	TRUE	TRUE	FALSE	TRUE	TRUE	24	1	1
Sel	TRUE	TRUE	TRUE	TRUE	TRUE	TRUE	48	1	1
Ctrl	FALSE	TRUE	TRUE	FALSE	TRUE	FALSE	19	1	1
Ctrl	TRUE	TRUE	TRUE	FALSE	TRUE	FALSE	37	1	1
Sel	TRUE	TRUE	FALSE	TRUE	TRUE	TRUE	57	1	1
Sel	TRUE	TRUE	TRUE	TRUE	TRUE	TRUE	18	0	1
Sel+Store	FALSE	TRUE	TRUE	TRUE	TRUE	FALSE	50	1	1
Sel+Store	TRUE	TRUE	TRUE	TRUE	TRUE	TRUE	55	1	1
Sel+Store	TRUE	TRUE	TRUE	TRUE	TRUE	TRUE	37	1	0
Sel	TRUE	TRUE	FALSE	FALSE	TRUE	TRUE	49	1	1
Ctrl	TRUE	TRUE	FALSE	FALSE	TRUE	FALSE	6	0	0
Store	FALSE	TRUE	TRUE	TRUE	TRUE	TRUE	29	0	0
Store	FALSE	TRUE	TRUE	FALSE	TRUE	TRUE	22	1	1
Sel+Store	TRUE	TRUE	TRUE	TRUE	TRUE	TRUE	22	0	0
Ctrl	FALSE	TRUE	TRUE	TRUE	TRUE	FALSE	29	1	0
Sel+Store	TRUE	TRUE	TRUE	TRUE	TRUE	FALSE	16	1	1
Sel	FALSE	TRUE	TRUE	FALSE	TRUE	TRUE	37	0	1
Sel+Store	FALSE	TRUE	TRUE	TRUE	TRUE	TRUE	49	1	1
Store	FALSE	TRUE	TRUE	TRUE	TRUE	TRUE	57	0	0
Store	FALSE	TRUE	TRUE	TRUE	TRUE	FALSE	44	0	1
Store	TRUE	TRUE	TRUE	TRUE	TRUE	TRUE	31	0	0
Sel	FALSE	TRUE	TRUE	TRUE	TRUE	FALSE	58	0	1
Sel+Store	TRUE	TRUE	TRUE	TRUE	TRUE	TRUE	24	0	1
Sel	TRUE	TRUE	TRUE	TRUE	TRUE	TRUE	43	1	1
Store	TRUE	TRUE	TRUE	TRUE	TRUE	TRUE	11	1	1
Store	FALSE	TRUE	TRUE	TRUE	TRUE	FALSE	18	1	1
Sel	TRUE	TRUE	TRUE	TRUE	TRUE	FALSE	21	1	1
Store	TRUE	TRUE	TRUE	TRUE	TRUE	FALSE	50	1	1
Ctrl	TRUE	TRUE	FALSE	FALSE	TRUE	FALSE	27	0	1
Ctrl	TRUE	TRUE	TRUE	FALSE	TRUE	FALSE	36	1	1
Sel	TRUE	TRUE	TRUE	TRUE	TRUE	FALSE	20	1	1
Sel	TRUE	TRUE	TRUE	TRUE	TRUE	TRUE	22	1	1
Sel	TRUE	TRUE	TRUE	TRUE	TRUE	TRUE	35	1	1
Sel	FALSE	TRUE	TRUE	TRUE	TRUE	FALSE	42	0	1
Sel+Store	TRUE	TRUE	TRUE	TRUE	TRUE	TRUE	25	1	1
Store	TRUE	TRUE	TRUE	TRUE	TRUE	TRUE	25	1	1
Ctrl	FALSE	TRUE	TRUE	FALSE	TRUE	FALSE	14	0	0
Ctrl	FALSE	TRUE	TRUE	FALSE	TRUE	FALSE	42	0	1
Sel+Store	TRUE	TRUE	TRUE	TRUE	TRUE	TRUE	57	1	0
Sel	TRUE	TRUE	TRUE	TRUE	TRUE	FALSE	11	1	1
Sel+Store	TRUE	TRUE	TRUE	TRUE	TRUE	TRUE	8	1	1
Ctrl	TRUE	TRUE	TRUE	TRUE	TRUE	FALSE	8	0	1
Sel+Store	TRUE	TRUE	TRUE	TRUE	TRUE	TRUE	45	1	1
Sel+Store	TRUE	TRUE	TRUE	TRUE	FALSE	TRUE	39	1	1
Sel+Store	TRUE	TRUE	TRUE	TRUE	TRUE	FALSE	1	1	0
Ctrl	FALSE	TRUE	TRUE	TRUE	TRUE	FALSE	44	0	1
Sel+Store	FALSE	TRUE	TRUE	TRUE	TRUE	FALSE	10	0	1
Store	TRUE	TRUE	TRUE	TRUE	TRUE	TRUE	27	1	1
Sel+Store	TRUE	TRUE	FALSE	TRUE	TRUE	FALSE	30	1	1
Sel	FALSE	TRUE	TRUE	FALSE	FALSE	FALSE	12	1	1
Ctrl	FALSE	TRUE	TRUE	TRUE	TRUE	FALSE	15	1	1
Store	FALSE	TRUE	TRUE	FALSE	FALSE	FALSE	30	1	1
Store	TRUE	TRUE	TRUE	TRUE	TRUE	FALSE	54	1	1
Ctrl	TRUE	TRUE	TRUE	FALSE	TRUE	FALSE	20	1	1
Sel	TRUE	TRUE	TRUE	TRUE	TRUE	TRUE	32	0	1
Ctrl	TRUE	TRUE	TRUE	FALSE	TRUE	FALSE	47	0	0
Ctrl	TRUE	TRUE	FALSE	FALSE	TRUE	FALSE	40	1	1
Sel	TRUE	TRUE	TRUE	TRUE	TRUE	TRUE	6	0	0
Sel+Store	TRUE	TRUE	TRUE	TRUE	TRUE	TRUE	51	0	0
Store	TRUE	TRUE	TRUE	TRUE	TRUE	TRUE	20	1	0
Ctrl	FALSE	FALSE	TRUE	FALSE	FALSE	TRUE	51	0	0
Sel+Store	TRUE	TRUE	TRUE	TRUE	TRUE	FALSE	23	1	1
Store	TRUE	TRUE	TRUE	TRUE	TRUE	FALSE	42	0	1
Store	TRUE	TRUE	TRUE	TRUE	TRUE	TRUE	51	0	0
Sel+Store	TRUE	TRUE	TRUE	TRUE	TRUE	TRUE	34	0	1
Sel	FALSE	TRUE	TRUE	TRUE	TRUE	TRUE	44	1	0
Sel+Store	TRUE	TRUE	TRUE	TRUE	TRUE	TRUE	35	1	1
Ctrl	FALSE	FALSE	TRUE	FALSE	FALSE	FALSE	57	1	1
Store	TRUE	TRUE	TRUE	TRUE	TRUE	TRUE	41	1	1
Sel	TRUE	TRUE	TRUE	TRUE	TRUE	FALSE	3	0	0
Store	TRUE	TRUE	TRUE	TRUE	TRUE	FALSE	12	1	1
Store	TRUE	FALSE	TRUE	TRUE	TRUE	TRUE	17	1	1
Sel+Store	TRUE	TRUE	TRUE	FALSE	TRUE	FALSE	12	1	1
Store	TRUE	TRUE	FALSE	TRUE	TRUE	TRUE	6	1	0
Ctrl	TRUE	TRUE	TRUE	FALSE	TRUE	FALSE	41	1	1
Sel	TRUE	TRUE	TRUE	TRUE	TRUE	TRUE	13	1	1
Sel	TRUE	TRUE	TRUE	TRUE	TRUE	FALSE	1	0	1
Sel+Store	TRUE	FALSE	TRUE	TRUE	TRUE	TRUE	3	0	0
Sel+Store	TRUE	TRUE	TRUE	TRUE	TRUE	TRUE	4	NA	1
Ctrl	FALSE	FALSE	TRUE	FALSE	TRUE	TRUE	50	1	0
Store	TRUE	TRUE	TRUE	TRUE	TRUE	TRUE	58	0	1
Sel+Store	TRUE	TRUE	TRUE	TRUE	TRUE	TRUE	40	1	1
Sel	TRUE	TRUE	TRUE	TRUE	TRUE	TRUE	47	1	0
Store	TRUE	TRUE	TRUE	TRUE	TRUE	TRUE	45	0	1
Ctrl	TRUE	TRUE	TRUE	FALSE	TRUE	TRUE	56	NA	1
Store	TRUE	FALSE	TRUE	TRUE	TRUE	TRUE	55	1	1
Sel+Store	TRUE	TRUE	TRUE	TRUE	TRUE	TRUE	20	1	1
Sel+Store	TRUE	TRUE	TRUE	TRUE	TRUE	TRUE	36	1	1
Sel+Store	TRUE	FALSE	TRUE	TRUE	TRUE	TRUE	9	1	1
Sel	TRUE	TRUE	TRUE	TRUE	TRUE	FALSE	36	1	0
Sel	TRUE	FALSE	TRUE	TRUE	TRUE	TRUE	7	1	1
Ctrl	TRUE	TRUE	TRUE	FALSE	TRUE	FALSE	33	1	1
Ctrl	TRUE	TRUE	TRUE	FALSE	TRUE	FALSE	52	1	1
Store	TRUE	TRUE	FALSE	FALSE	TRUE	TRUE	43	1	1
Ctrl	TRUE	TRUE	TRUE	TRUE	TRUE	TRUE	5	1	0
Sel	TRUE	TRUE	TRUE	TRUE	TRUE	TRUE	33	1	1
Ctrl	TRUE	TRUE	TRUE	FALSE	TRUE	FALSE	55	1	1
Sel	TRUE	TRUE	TRUE	TRUE	TRUE	TRUE	45	0	1
Store	TRUE	TRUE	TRUE	TRUE	TRUE	TRUE	23	0	1
Sel+Store	TRUE	TRUE	TRUE	TRUE	TRUE	TRUE	29	1	1
Sel	TRUE	TRUE	TRUE	TRUE	TRUE	TRUE	28	1	1
Store	TRUE	TRUE	TRUE	TRUE	TRUE	TRUE	33	1	0
Ctrl	TRUE	FALSE	TRUE	FALSE	TRUE	FALSE	18	0	1
Sel+Store	TRUE	TRUE	TRUE	TRUE	TRUE	TRUE	54	1	1
Sel	TRUE	TRUE	TRUE	FALSE	TRUE	TRUE	51	1	1
Store	TRUE	TRUE	TRUE	TRUE	TRUE	TRUE	32	0	1
